# Supplementary material for: Photocatalytic membranes based on Cu–NH2-MIL-125(Ti) protected by poly(vinylidene fluoride) for high and stable hydrogen production
Source: Royal Society of Chemistry journal article supplement (doi:10.1039/d4mh01397b), 2024-12-23
Supplement: d4mh01397b1.pdf [file d4mh01397b1.pdf]

## Supporting Information

### Photocatalytic membranes based on Cu-NH<sub>2</sub>-MIL-125(Ti) protected by poly(vinylidene fluoride) for high and stable hydrogen production

*Emilia Gontarek-Castro*<sup>a\*</sup>, *Anna Pancielejko*<sup>a</sup>, *Mateusz Baluk*<sup>a</sup>, *Malwina Kroczevska-Gnatowska*<sup>b</sup>, *Przemysław Gnatowski*<sup>c</sup>, *Krzysztof Matus*<sup>d</sup>, *Justyna Łuczak*<sup>b</sup>, *Adriana Zaleska-Medynska*<sup>a</sup>

<sup>a</sup> Department of Environmental Technology, Faculty of Chemistry, University of Gdansk, 80-308 Gdansk, Poland

<sup>b</sup> Gdansk University of Technology, Faculty of Chemistry, Department of Process Engineering and Chemical Technology, 80–233 Gdansk, Poland

<sup>c</sup> Department of Polymer Technology, Faculty of Chemistry, Gdańsk University of Technology, 80-233 Gdańsk, Poland

<sup>d</sup> Materials Research Laboratory, Faculty of Mechanical Engineering, Silesian University of Technology, 44-100 Gliwice, Poland

**\* Corresponding author:**

*E-mail: emilia.gontarek-castro@ug.edu.pl; (E. Gontarek-Castro)*

## Contents

**Figure. S1.** The SEM (a) and TEM (b) image of MOF.

**Figure. S2.** FTIR patterns of Cu-NH<sub>2</sub>-MIL-125(Ti).

**Figure. S3.** XRD pattern of Cu-NH<sub>2</sub>-MIL-125 (Ti).

**Fig. S4.** Hydrogen production in two different electrolytes using membranes with and without MOF

**Figure. S5.** Instability of powdered Cu-NH<sub>2</sub>-MIL-125 MOF in electrolyte (A)

**Fig. S6.** Stability of powdered Cu-NH<sub>2</sub>-MIL-125 MOF in electrolyte (B)

**Fig. S7.** FTIR spectra of PVDF/MOF membranes before and after the photo process

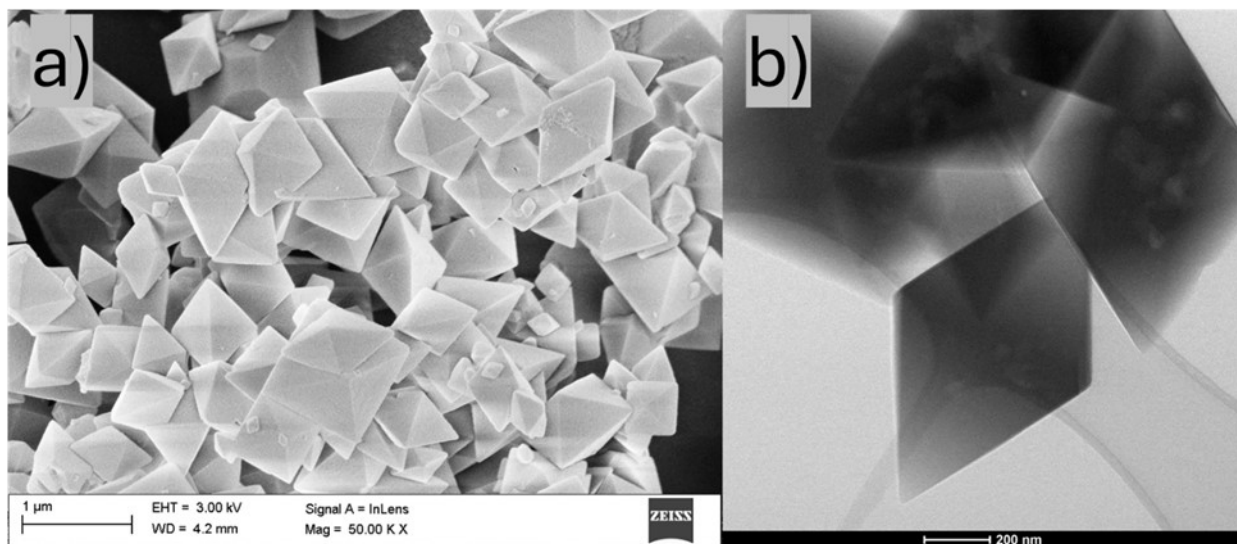

**Fig. S1.** The SEM (a) and TEM (b) image of MOF

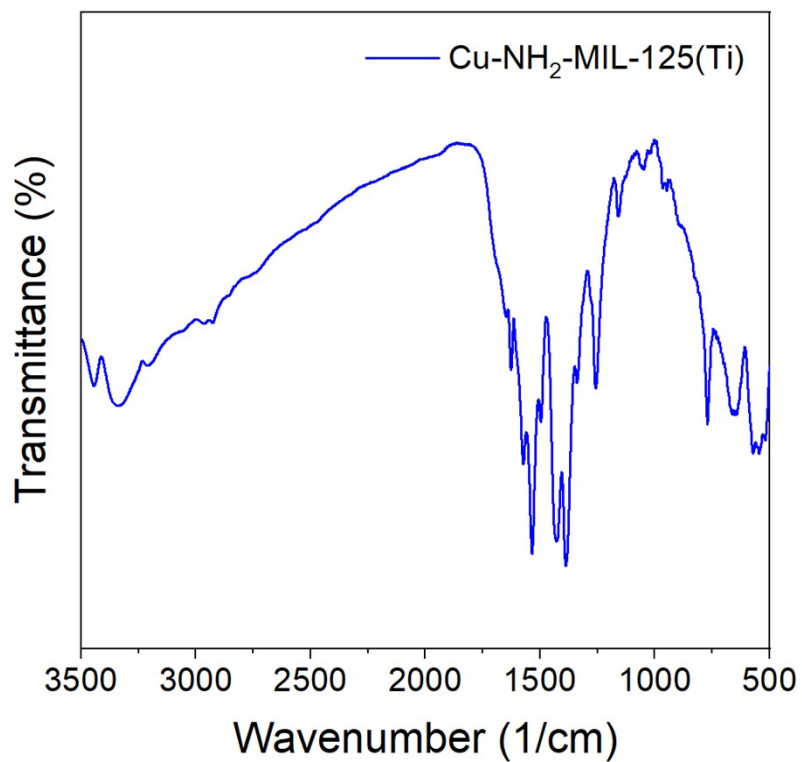

**Fig. S2.** FTIR patterns of Cu-NH<sub>2</sub>-MIL-125(Ti).

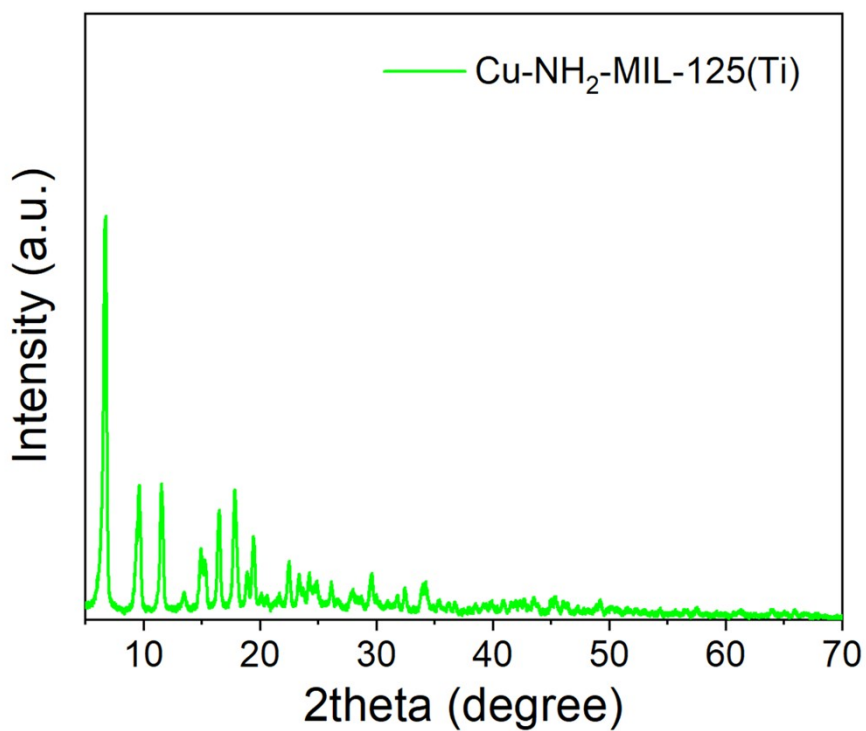

**Fig. S3.** XRD pattern of Cu-NH<sub>2</sub>-MIL-125(Ti).

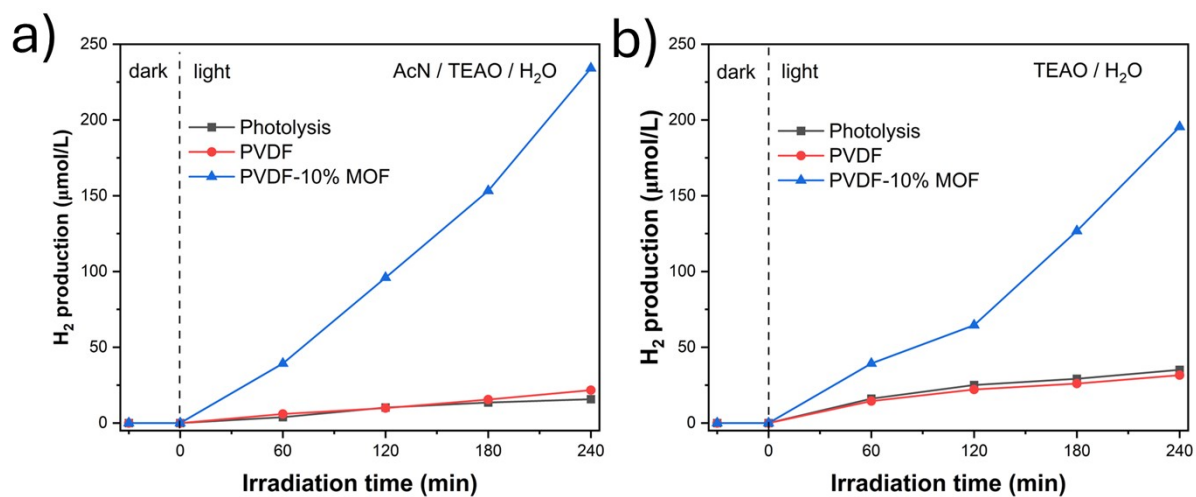

**Fig. S4.** Hydrogen production in two different electrolytes using membranes with and

without MOF

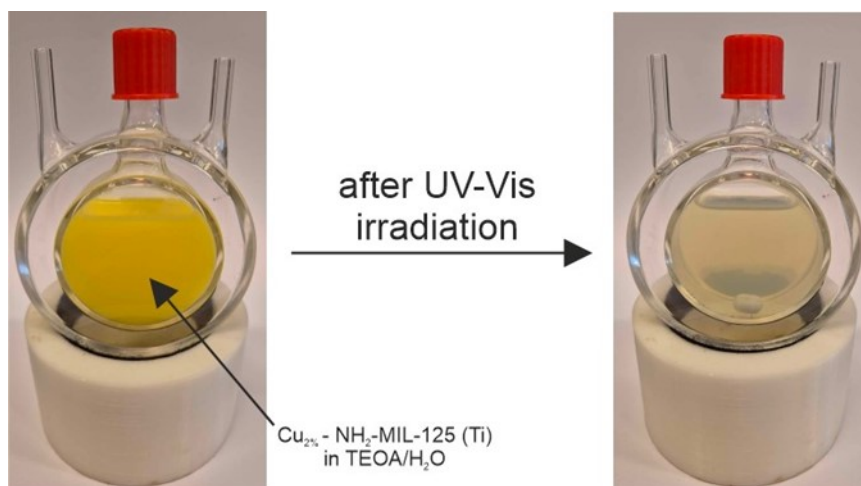

**Fig. S5.** Instability of powdered Cu-NH<sub>2</sub>-MIL-125 MOF in electrolyte (A)

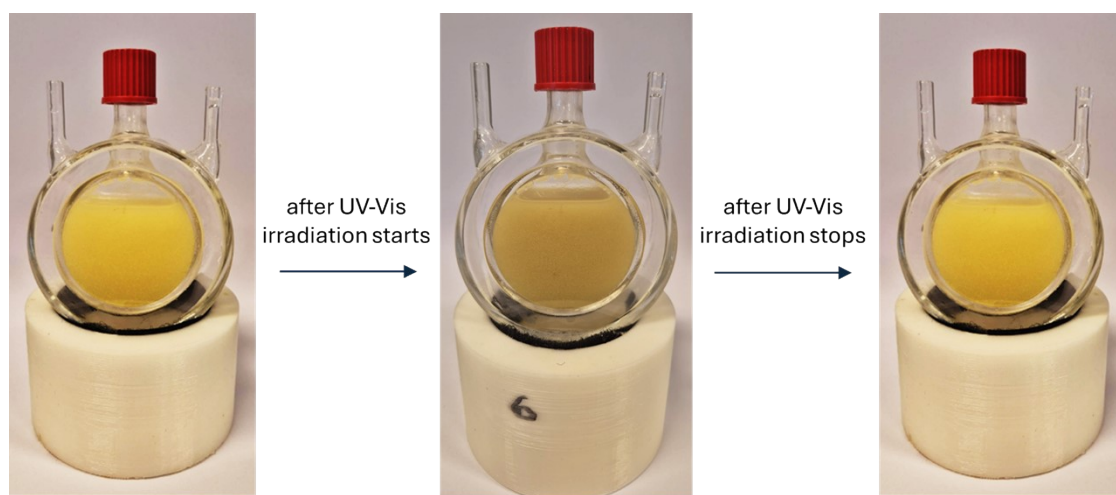

**Fig. S6.** Stability of powdered Cu-NH<sub>2</sub>-MIL-125 MOF in electrolyte (B)

During the photoprocess, the change of MOF color can be observed due to the cyclic process of the oxidation and reduction of copper ions. Cu<sup>2+</sup> is supposed to be reduced to Cu<sup>+</sup> after trapping an electron and quickly return to Cu<sup>2+</sup> due to the instability of Cu<sup>+</sup>, releasing the electron again [1]. Importantly, after the irradiation stops, the MOF fully recovers its original color.

[1] D. Ao, J. Zhang, H. Liu, J. Photochem. Photobiol. A Chem., 2018, **364**, 524.

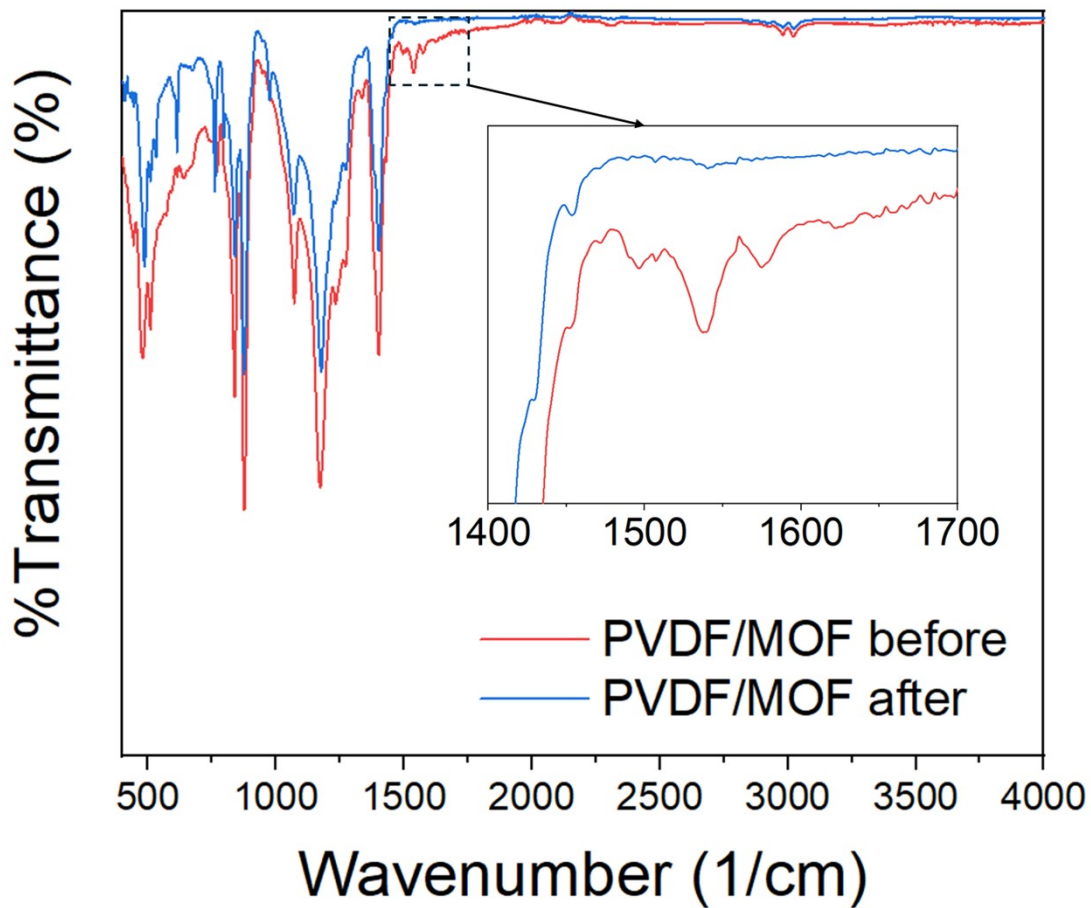

**Fig. S7.** FTIR spectra of PVDF/MOF membranes before and after the photo process
